# Supplementary material for: Navigating Calcium and Reactive Oxygen Species by Natural Flavones for the Treatment of Heart Failure
Source: PubMed Central journal article supplement (PMC8630744; doi:10.3389/fphar.2021.718496), 2021-11-09
Supplement: Table1.pdf [file Table1.pdf]

## Supplemental Table

# A mini review of navigating calcium and reactive oxygen species by natural flavonoids and their potentials to treat heart failure

Tianhao Yu<sup>1,\*,#</sup>, Danhua Huang<sup>2,#</sup>, Haokun Wu<sup>1</sup>, Haibin Chen<sup>1</sup>, Sen Chen<sup>1</sup>, Qingbin Cui<sup>2</sup>

<sup>1</sup> Department of Cardiology, Guangdong Second Provincial General Hospital, Guangzhou, Guangdong 510314, China. <sup>2</sup> School of Public Health, Guangzhou Medical University, Guangzhou, Guangdong 511436, China.

# Tianhao Yu and Danhua Huang contributed equally.

\* Corresponding author: Tianhao Yu, email: [eshldr@126.com](mailto:eshldr@126.com)

**Table 1.** The clinical trials using flavonoids for the treatment of HF-related diseases

| Drug candidates   | Indications/Condition     | Results                         | ClinicalTrials.gov Identifier/Refs |
|-------------------|---------------------------|---------------------------------|------------------------------------|
| Apigenin/luteonin | High cholesterol          | Not revealed yet                | NCT04114916                        |
| Naringenin        | Mild hypercholesterolemia | Not revealed yet                | NCT00539916                        |
|                   | Mild hypercholesterolemia | No effects on serum cholesterol | (67)                               |
| Kaempferol        | Dyslipidemia              | Not revealed yet                | NCT04110392                        |
| Quercetin         | Hypertension              | Reducing blood pressure         | NCT01691404, (87)                  |
|                   | Coronary artery disease   | Not revealed yet                | NCT03943459                        |
| Genistein         | Metabolic syndrome        | Improving cardiac function      | NCT00541710                        |

67. Demonty L, Lin Y., Zebregs Y. E., Vermeer M. A., van der Knaap H. C., Jakel M. and Trautwein E. A.: The citrus flavonoids hesperidin and naringin do not affect serum cholesterol in moderately hypercholesterolemic men and women. *J. Nutr.* (2010) 140(9): 1615-20.

87. Serban M. C., Sahebkar A., Zanchetti A., Mikhailidis D. P., Howard G., Antal D., Andrica F., Ahmed A., Aronow W. S., Muntner P., Lip G. Y., Graham I., Wong N., Rysz J. and Banach M.: Effects of Quercetin on Blood Pressure: A Systematic Review and Meta-Analysis of Randomized Controlled Trials. *J. Am. Heart Assoc.* (2016) 5(7)
